# Supplementary material for: Unexpected longer T1 lifetime of 6-sulfur guanine than 6-selenium guanine: the solvent effect of hydrogen bonds to brake the triplet decay
Source: Royal Society of Chemistry journal article supplement (doi:10.1039/d4cp00875h), 2024-01-01
Supplement: d4cp00875h1.pdf [file d4cp00875h1.pdf]

## Supporting Information

### Unexpected Longer $T_1$ Lifetime of 6-Sulfur Guanine than 6-Selenium

### Guanine: Solvent Effect from Hydrogen Bond to Brake the Triplet

### Decay

Shaoting Liu, Yuhsuan Lee, Lingfang Chen, Jingheng Deng, Tongmei Ma, Mario Barbatti, and  
Shuming Bai

### Table of Contents

|                                                                                            |    |
|--------------------------------------------------------------------------------------------|----|
| S1. Cartesian coordinates for all optimized structures.....                                | 2  |
| S2. Parameters used in the quasi-Marcus formula.....                                       | 10 |
| S3. Potential energy profiles of 6tGua and 6SeGua computed at different levels .....       | 11 |
| S4. The reorganization energy of 6tGua and 6SeGua in gas phase and with solvent model..... | 13 |
| S5. The Spin-orbit couplings of 6tGua and 6SeGua .....                                     | 13 |
| S6. Mono-hydrated complex of 6tGua and 6SeGua .....                                        | 14 |
| S7. Di-hydrated complex and tri-hydrated complex of 6tGua and 6SeGua.....                  | 15 |

## S1. Cartesian coordinates for all optimized structures

Table S1. 6tGua optimized structures using ADC(2)/aug-cc-pVDZ calculation.

|   | S <sub>0</sub> min            |            |            |
|---|-------------------------------|------------|------------|
| C | -0.4507531                    | 0.8810128  | 0.0352625  |
| C | -0.1982678                    | 3.3065186  | 0.2730578  |
| C | -2.3400534                    | 2.0471077  | 0.0408862  |
| H | -2.0939775                    | 4.0843526  | 0.3291815  |
| C | 0.3930395                     | 2.0006511  | 0.1771875  |
| N | 0.3974698                     | -0.1997763 | -0.0180463 |
| H | 0.1160378                     | -1.1693587 | -0.1188009 |
| N | 1.722748                      | 1.6219643  | 0.2119004  |
| C | 1.6838414                     | 0.2948482  | 0.0924405  |
| N | -1.8135848                    | 0.8405696  | -0.0572707 |
| N | -1.6048157                    | 3.1979132  | 0.2052144  |
| N | -3.7218007                    | 2.2006158  | 0.0527618  |
| H | -4.0746003                    | 3.0160963  | -0.4409767 |
| H | -4.1903397                    | 1.3442412  | -0.2311109 |
| S | 0.5248627                     | 4.7888275  | 0.4546429  |
| H | 2.5532051                     | -0.3589144 | 0.0803652  |
|   | T <sub>1</sub> op-S           |            |            |
| C | -0.4424699                    | 0.9036115  | 0.0006991  |
| C | -0.2183324                    | 3.2976729  | 0.5634534  |
| C | -2.3445699                    | 2.07236    | 0.0608543  |
| H | -2.1744649                    | 4.0576273  | 0.5066445  |
| C | 0.3920034                     | 2.0068967  | 0.3250788  |
| N | 0.4097293                     | -0.1717504 | -0.0957827 |
| H | 0.1371924                     | -1.1248936 | -0.3118549 |
| N | 1.711015                      | 1.6134977  | 0.4084678  |
| C | 1.6833551                     | 0.3000928  | 0.1484464  |
| N | -1.8007784                    | 0.8694592  | -0.1375437 |
| N | -1.6462671                    | 3.2042232  | 0.3411301  |
| N | -3.7296682                    | 2.1724585  | 0.038344   |
| H | -4.1051805                    | 3.0395838  | -0.3350347 |
| H | -4.1564889                    | 1.3476854  | -0.374286  |
| S | 0.6332264                     | 4.658854   | -0.1777995 |
| H | 2.5547063                     | -0.3507017 | 0.1258786  |
|   | T <sub>1</sub> ring-distorted |            |            |
| N | -1.5595773                    | 3.2591188  | -0.096388  |
| C | -0.2459908                    | 3.3021309  | 0.2831779  |
| C | 0.389001                      | 2.0105774  | 0.2107092  |
| C | -0.4923309                    | 0.8458721  | 0.0500368  |
| N | -1.746314                     | 0.8280438  | -0.2940255 |
| C | -2.1402357                    | 2.1449182  | -0.7765287 |

|   |            |            |            |
|---|------------|------------|------------|
| N | 1.6452968  | 1.6304167  | 0.6134647  |
| C | 1.5710952  | 0.3001859  | 0.7107481  |
| N | 0.3210217  | -0.2183406 | 0.4336119  |
| S | 0.4865253  | 4.6849319  | 0.8940544  |
| N | -3.542172  | 2.269165   | -0.9661856 |
| H | -2.1078172 | 4.1132822  | 0.0127301  |
| H | 0.0569764  | -1.1977245 | 0.4100224  |
| H | -3.7736533 | 2.8119041  | -1.7982726 |
| H | -3.9491896 | 1.3379521  | -1.0536572 |
| H | 2.408663   | -0.3410968 | 0.9814223  |

Table S2. 6SeGua optimized structures using ADC(2)/aug-cc-pVDZ calculation.

| $S_0$ min   |            |            |            |
|-------------|------------|------------|------------|
| Se          | -0.1222025 | 3.1785054  | -0.4484277 |
| N           | 2.2948068  | -1.3053889 | 0.199041   |
| C           | 3.1545222  | -0.2321651 | 0.0529493  |
| N           | 2.5178995  | 0.9262696  | -0.1190207 |
| C           | 1.017042   | -0.8046191 | 0.1161984  |
| N           | -0.1391115 | -1.5280093 | 0.1874173  |
| C           | -1.2029000 | -0.7518094 | 0.0812007  |
| N           | -2.4746416 | -1.2960114 | 0.2129346  |
| N           | -1.1468174 | 0.6115822  | -0.0880474 |
| C           | 0.0110062  | 1.4034939  | -0.2030675 |
| C           | 1.1792909  | 0.5821888  | -0.0817163 |
| H           | 2.5421685  | -2.2795728 | 0.3387745  |
| H           | -3.1861456 | -0.8997735 | -0.3950956 |
| H           | -2.4522953 | -2.311461  | 0.1748824  |
| H           | -2.0175058 | 1.143125   | -0.1076999 |
| H           | 4.2353724  | -0.3531724 | 0.0804929  |
| $T_1$ op-Se |            |            |            |
| Se          | -0.089145  | 3.0351126  | -1.0082221 |
| N           | 2.3035283  | -1.3008027 | 0.1547335  |
| C           | 3.1643741  | -0.2317928 | 0.0783977  |
| N           | 2.5206904  | 0.9456643  | 0.0092268  |
| C           | 1.0200759  | -0.787965  | 0.1319794  |
| N           | -0.1583494 | -1.5179167 | 0.1065292  |
| C           | -1.212056  | -0.7350618 | 0.0772724  |
| N           | -2.4957951 | -1.2828512 | 0.166674   |
| N           | -1.1863357 | 0.6494537  | 0.0241802  |
| C           | 0.0126771  | 1.4328481  | 0.0286813  |
| C           | 1.1861722  | 0.5984086  | 0.0459707  |
| H           | 2.5509232  | -2.2829625 | 0.2120493  |
| H           | -3.1528531 | -0.9046878 | -0.5124958 |
| H           | -2.4499639 | -2.2978597 | 0.1109792  |

|                               |            |            |            |
|-------------------------------|------------|------------|------------|
| H                             | -2.048544  | 1.1180577  | 0.2951702  |
| H                             | 4.2451297  | -0.3544639 | 0.0796901  |
| T <sub>1</sub> ring-distorted |            |            |            |
| Se                            | 0.7631509  | 4.8710611  | 0.5641806  |
| N                             | 0.3252088  | -0.160431  | 0.6169168  |
| C                             | 1.6260342  | 0.3286434  | 0.5993516  |
| N                             | 1.7190193  | 1.6344518  | 0.3774784  |
| C                             | -0.5249007 | 0.9001592  | 0.3217616  |
| N                             | -1.8232126 | 0.9040021  | 0.243529   |
| C                             | -2.3280623 | 2.1885516  | -0.2002925 |
| N                             | -3.7215226 | 2.4373793  | -0.0151531 |
| N                             | -1.5382695 | 3.3245291  | 0.1625002  |
| C                             | -0.1810517 | 3.3161427  | 0.2570891  |
| C                             | 0.4044879  | 2.0377198  | 0.2015265  |
| H                             | 0.0381399  | -1.1267378 | 0.7309243  |
| H                             | -4.2384415 | 2.2576192  | -0.8750238 |
| H                             | -4.096196  | 1.8080386  | 0.7007462  |
| H                             | -2.029453  | 4.2154027  | 0.2498889  |
| H                             | 2.48029    | -0.3292211 | 0.7544599  |

Table S3. T<sub>1</sub>/S<sub>0</sub> crossing point structures of 6tGua.

| DFT/B3LYP/cc-pVDZ |             |             |             |
|-------------------|-------------|-------------|-------------|
| C                 | 0.73791411  | -0.99509572 | -0.12990482 |
| C                 | -0.45211516 | 1.10557541  | 0.47043926  |
| C                 | -1.47855206 | -1.14379822 | 0.03413706  |
| H                 | -2.45219304 | 0.50309983  | 0.72633733  |
| C                 | 0.79788356  | 0.37589739  | 0.25502849  |
| N                 | 2.04387021  | -1.39494515 | -0.22520227 |
| H                 | 2.36381961  | -2.32617019 | -0.46119536 |
| N                 | 2.11233663  | 0.77153116  | 0.39558642  |
| C                 | 2.82101213  | -0.29243857 | 0.10211002  |
| N                 | -0.34692392 | -1.77619389 | -0.29369787 |
| N                 | -1.54128233 | 0.12525154  | 0.48864225  |
| N                 | -2.64022724 | -1.86840511 | -0.02419788 |
| H                 | -3.49807774 | -1.36417665 | -0.21998631 |
| H                 | -2.54340689 | -2.75203068 | -0.51373114 |
| S                 | -0.42932053 | 2.18366051  | -0.97759745 |
| H                 | 3.90826281  | -0.34546164 | 0.10838227  |
| DFT/B3LYP/cc-pVDZ |             | PCM (water) |             |
| C                 | 0.78359900  | -0.96820093 | -0.13614930 |
| C                 | -0.51154018 | 1.10689881  | 0.38506661  |
| C                 | -1.43952327 | -1.19408481 | 0.01797613  |
| H                 | -2.48954636 | 0.42432942  | 0.64091523  |
| C                 | 0.78446425  | 0.42110880  | 0.21689790  |

|   |             |             |             |
|---|-------------|-------------|-------------|
| N | 2.10972884  | -1.31834366 | -0.17749855 |
| H | 2.48623321  | -2.23623450 | -0.38990939 |
| N | 2.07098318  | 0.86270642  | 0.39515546  |
| C | 2.83176652  | -0.19110375 | 0.14342254  |
| N | -0.25986103 | -1.79169087 | -0.27656979 |
| N | -1.55324313 | 0.07593226  | 0.46288984  |
| N | -2.54734899 | -1.94235058 | -0.11965561 |
| H | -3.45829979 | -1.60296776 | 0.16290121  |
| H | -2.43577851 | -2.93127558 | 0.30817027  |
| S | -0.54712987 | 2.10022468  | -1.10608797 |
| H | 3.91936606  | -0.20622783 | 0.17688601  |

TDA/B3LYP/cc-pVDZ

|   |             |             |             |
|---|-------------|-------------|-------------|
| C | 0.73634631  | -0.99653338 | -0.12672784 |
| C | -0.45154061 | 1.10646212  | 0.47025235  |
| C | -1.47857102 | -1.14373559 | 0.02570240  |
| H | -2.44659120 | 0.48767264  | 0.74284481  |
| C | 0.79311187  | 0.37746011  | 0.25006749  |
| N | 2.04070883  | -1.39785884 | -0.21103560 |
| H | 2.35753209  | -2.32818045 | -0.45361085 |
| N | 2.11104614  | 0.77580179  | 0.38369653  |
| C | 2.81806253  | -0.29015678 | 0.10210354  |
| N | -0.34741699 | -1.77873798 | -0.29836235 |
| N | -1.53912642 | 0.12807937  | 0.46808406  |
| N | -2.64084694 | -1.86894555 | -0.02267378 |
| H | -3.50321141 | -1.37110819 | -0.21722450 |
| H | -2.54089504 | -2.75179918 | -0.51230580 |
| S | -0.41052729 | 2.20146330  | -0.96952203 |
| H | 3.90490913  | -0.34359343 | 0.10386156  |

TDA/B3LYP/cc-pVDZ PCM (water)

|   |             |             |             |
|---|-------------|-------------|-------------|
| C | 0.78043642  | -0.96543927 | -0.13780835 |
| C | -0.50979629 | 1.10626379  | 0.39257564  |
| C | -1.43985161 | -1.19384338 | 0.01402650  |
| H | -2.48677717 | 0.42027254  | 0.65455366  |
| C | 0.77830490  | 0.42431408  | 0.21836896  |
| N | 2.10551438  | -1.31644643 | -0.17871917 |
| H | 2.47942432  | -2.23763686 | -0.38191320 |
| N | 2.07026664  | 0.86627436  | 0.38916447  |
| C | 2.82691241  | -0.18749725 | 0.14007559  |
| N | -0.26147099 | -1.78945537 | -0.28332735 |
| N | -1.55146903 | 0.07846244  | 0.45963958  |
| N | -2.54793506 | -1.94291520 | -0.12301585 |
| H | -3.45898702 | -1.60863888 | 0.16483335  |
| H | -2.43181234 | -2.93174806 | -0.30865018 |
| S | -0.52308409 | 2.09033977  | -1.10929197 |

H 3.91419455 -0.20357627 0.17756830

Table S4.  $T_1/S_0$  crossing point structures of 6SeGua.

| DFT/B3LYP/cc-pVDZ |             |             |             |
|-------------------|-------------|-------------|-------------|
| Se                | 1.90970030  | -0.20291376 | -0.81408116 |
| N                 | -2.41510044 | -1.54800780 | -0.28180628 |
| C                 | -1.59287623 | -2.60362600 | 0.08418030  |
| N                 | -0.39597313 | -2.21748803 | 0.45653446  |
| C                 | -1.67448098 | -0.40486319 | -0.13629464 |
| N                 | -2.11458459 | 0.86000174  | -0.33105617 |
| C                 | -1.21244287 | 1.76483253  | 0.03899859  |
| N                 | -1.56580480 | 3.09184271  | -0.04125417 |
| N                 | 0.00165001  | 1.46802442  | 0.55908930  |
| C                 | 0.61948762  | 0.15294065  | 0.64506607  |
| C                 | -0.40572126 | -0.84135862 | 0.32474894  |
| H                 | -3.37714389 | -1.59176755 | -0.59515760 |
| H                 | -0.82657433 | 3.75485428  | -0.25344575 |
| H                 | -2.41169403 | 3.23673188  | -0.58382268 |
| H                 | 0.58874791  | 2.24042043  | 0.85126341  |
| H                 | -1.93658935 | -3.63565378 | 0.04649743  |
| DFT/B3LYP/cc-pVDZ |             | PCM (water) |             |
| Se                | 1.84098592  | -0.10464727 | -0.88407849 |
| N                 | -2.36199755 | -1.60075096 | -0.29793611 |
| C                 | -1.54574755 | -2.62704818 | 0.12445137  |
| N                 | -0.35137403 | -2.21481911 | 0.51004511  |
| C                 | -1.63916497 | -0.44048683 | -0.17949252 |
| N                 | -2.09885759 | 0.80645666  | -0.38224801 |
| C                 | -1.22800971 | 1.74731305  | 0.02344857  |
| N                 | -1.59842308 | 3.03608086  | -0.11245286 |
| N                 | -0.03295432 | 1.47477775  | 0.61472023  |
| C                 | 0.63241556  | 0.18357766  | 0.62049812  |
| C                 | -0.36909731 | -0.85057641 | 0.32095525  |
| H                 | -3.32106208 | -1.68436935 | -0.61923033 |
| H                 | -0.94559068 | 3.79768176  | 0.02290807  |
| H                 | -2.46976717 | 3.22824494  | -0.59220534 |
| H                 | 0.54148611  | 2.26695558  | 0.88352078  |
| H                 | -1.88449162 | -3.66128001 | 0.12314601  |
| TDA/B3LYP/cc-pVDZ |             |             |             |
| Se                | 2.01608490  | -0.16864687 | -0.67485550 |
| N                 | 2.37604318  | -1.60556309 | -0.28974219 |
| C                 | -1.51280223 | -2.63474026 | 0.06432543  |
| N                 | -0.33543618 | -2.21076811 | 0.44674485  |
| C                 | -1.68115004 | -0.43987756 | -0.12388231 |
| N                 | -2.15605731 | 0.80743350  | -0.33633728 |

|    |                   |             |             |
|----|-------------------|-------------|-------------|
| C  | -1.28213656       | 1.73609219  | 0.03698172  |
| N  | -1.66426649       | 3.05479052  | -0.05025557 |
| N  | -0.06044580       | 1.46849303  | 0.56309400  |
| C  | 0.56758239        | 0.17970204  | 0.72128175  |
| C  | -0.40032619       | -0.82722142 | 0.34850991  |
| H  | -3.33016371       | -1.68455364 | -0.62082590 |
| H  | -0.93432821       | 3.72781156  | -0.26223235 |
| H  | -2.50638901       | 3.17917969  | -0.60409478 |
| H  | 0.46894493        | 2.25754541  | 0.91758115  |
| H  | -1.82301729       | -3.67704705 | 0.01594699  |
|    | TDA/B3LYP/cc-pVDZ | PCM (water) |             |
| Se | 1.87221051        | -0.15560408 | -0.79618445 |
| N  | -2.37585205       | -1.57875899 | -0.32509560 |
| C  | -1.57307856       | -2.61378646 | 0.10630914  |
| N  | -0.38505282       | -2.21651801 | 0.51512061  |
| C  | -1.64730171       | -0.42650868 | -0.18594279 |
| N  | -2.08708712       | 0.82256137  | -0.40949228 |
| C  | -1.21491027       | 1.75440297  | 0.01375979  |
| N  | -1.57079836       | 3.04775209  | -0.12599451 |
| N  | -0.03495176       | 1.46508236  | 0.62344382  |
| C  | 0.60722940        | 0.16790141  | 0.69323890  |
| C  | -0.38876266       | -0.84451264 | 0.34230351  |
| H  | -3.33133277       | -1.65220846 | -0.65906275 |
| H  | -0.90444292       | 3.79872939  | 0.00370397  |
| H  | -2.41566749       | 3.24493025  | -0.64855795 |
| H  | 0.53149090        | 2.25017365  | 0.92770177  |
| H  | -1.92516233       | -3.64366616 | 0.09723883  |

Table S5.  $T_1/S_0$  crossing point structures of 6tGua mono-hydrated complex.

|   | DFT/B3LYP/cc-pVDZ | PCM (water) |             |
|---|-------------------|-------------|-------------|
| C | 1.50323607        | 0.61312740  | -0.12874287 |
| C | -0.46882469       | -0.76169338 | 0.56679891  |
| C | -0.44982162       | 1.68666343  | 0.06796077  |
| H | -2.05275522       | 0.60129851  | 0.69548934  |
| C | 0.98237431        | -0.64863261 | 0.31565469  |
| N | 2.85919139        | 0.41523896  | -0.22744438 |
| H | 3.55125054        | 1.10676983  | -0.49751551 |
| N | 2.00143204        | -1.54548857 | 0.48452071  |
| C | 3.10047528        | -0.88670954 | 0.14048954  |
| N | 0.86076160        | 1.77264339  | -0.27758255 |
| N | -1.02698942       | 0.59838373  | 0.62611800  |
| N | -1.19134161       | 2.78877192  | -0.13578248 |
| H | -2.15037703       | 2.85314765  | 0.18088933  |
| H | -0.71763465       | 3.63393609  | -0.43198916 |

|                               |             |             |             |
|-------------------------------|-------------|-------------|-------------|
| S                             | -0.96204690 | -1.68907015 | -0.88562837 |
| H                             | 4.10589480  | -1.30267238 | 0.13660557  |
| O                             | -3.72894624 | -0.14031186 | 0.13957429  |
| H                             | -3.94482111 | -0.80745539 | 0.81195500  |
| H                             | -3.19349758 | -0.64959708 | -0.50312082 |
| TDA/B3LYP/cc-pVDZ PCM (water) |             |             |             |
| C                             | 1.50153795  | 0.61364019  | -0.13021431 |
| C                             | -0.46785448 | -0.76321758 | 0.57541951  |
| C                             | -0.44992123 | 1.68685581  | 0.06710496  |
| H                             | -2.04994119 | 0.60202224  | 0.69797320  |
| C                             | 0.97714216  | -0.64931845 | 0.31243261  |
| N                             | 2.85757820  | 0.41574773  | -0.22650257 |
| H                             | 3.55095952  | 1.10626656  | -0.49582268 |
| N                             | 1.99942437  | -1.54774799 | 0.47883241  |
| C                             | 3.09609909  | -0.88696219 | 0.13986870  |
| N                             | 0.86155367  | 1.77347997  | -0.27677352 |
| N                             | -1.02518090 | 0.59707855  | 0.62034268  |
| N                             | -1.19124291 | 2.78900102  | -0.13569288 |
| H                             | -2.15020626 | 2.85239317  | 0.18100083  |
| H                             | -0.71763907 | 3.63390457  | -0.43280182 |
| S                             | -0.94815555 | -1.68894732 | -0.88925995 |
| H                             | 4.10260635  | -1.30037044 | 0.13973367  |
| O                             | -3.72532659 | -0.13888013 | 0.14289271  |
| H                             | -3.95010613 | -0.80724426 | 0.81101099  |
| H                             | -3.19377699 | -0.64935141 | -0.50129453 |

Table S6.  $T_1/S_0$  crossing point structures of 6SeGua mono-hydrated complex.

|    | DFT/B3LYP/cc-pVDZ | PCM (water) |             |
|----|-------------------|-------------|-------------|
| Se | 0.30678513        | -1.79528758 | -0.96184184 |
| N  | -2.90806460       | 1.26045443  | -0.18865297 |
| C  | -3.41469193       | 0.06753750  | 0.27659701  |
| N  | -2.47497559       | -0.80295950 | 0.60079667  |
| C  | -1.53890980       | 1.15012608  | -0.16970327 |
| N  | -0.66368808       | 2.13708926  | -0.42730067 |
| C  | 0.59976393        | 1.79338400  | -0.10128927 |
| N  | 1.57439357        | 2.69443223  | -0.31158852 |
| N  | 0.95083788        | 0.60897423  | 0.47297893  |
| C  | 0.11351465        | -0.57145132 | 0.54726943  |
| C  | -1.28604915       | -0.16456412 | 0.32173088  |
| H  | -3.44347576       | 2.07817014  | -0.46108156 |
| H  | 2.54433335        | 2.45618547  | -0.10333488 |
| H  | 1.32449656        | 3.59249573  | -0.70531264 |
| H  | 1.95441359        | 0.47744779  | 0.61865435  |
| H  | -4.48689600       | -0.10471794 | 0.35019296  |



|                               |             |             |             |
|-------------------------------|-------------|-------------|-------------|
| O                             | 3.83684294  | 1.09640472  | 0.43891975  |
| H                             | 4.39083381  | 0.70359895  | -0.25498971 |
| H                             | 4.42119534  | 1.14003005  | 1.21266527  |
| TDA/B3LYP/cc-pVDZ PCM (water) |             |             |             |
| Se                            | 0.78032081  | -1.89930996 | -0.81545322 |
| N                             | -3.27920925 | -0.06792534 | -0.17122121 |
| C                             | -3.33249742 | -1.32278151 | 0.39679736  |
| N                             | -2.15014277 | -1.78396094 | 0.75242318  |
| C                             | -1.95969834 | 0.30852541  | -0.18511323 |
| N                             | -1.48514518 | 1.50667456  | -0.55628119 |
| C                             | -0.17773099 | 1.64900548  | -0.25433358 |
| N                             | 0.42378547  | 2.80628190  | -0.58047960 |
| N                             | 0.56444508  | 0.70626436  | 0.38642332  |
| C                             | 0.18862385  | -0.66886129 | 0.62257887  |
| C                             | -1.25580766 | -0.79071070 | 0.39565874  |
| H                             | -4.06606201 | 0.48649488  | -0.49219970 |
| H                             | 1.39977966  | 2.96091458  | -0.32985986 |
| H                             | -0.14783337 | 3.55499207  | -0.95057944 |
| H                             | 1.54057347  | 0.96010932  | 0.55443276  |
| H                             | -4.27835323 | -1.84636167 | 0.52345129  |
| O                             | 3.05659335  | 2.20655036  | 0.40034024  |
| H                             | 3.48840325  | 2.50946853  | 1.21504347  |
| H                             | 3.79031528  | 1.90949995  | -0.16172820 |

## S2. Parameters used in the quasi-Marcus formula

The classic Marcus formula can be expressed as:<sup>1, 2</sup>

$$k_{ISC} = \frac{2\pi}{\hbar} |H_{SOC}|^2 \frac{1}{\sqrt{4\pi\lambda k_B T}} \exp\left(-\frac{(\lambda + \Delta G^0)^2}{k_B T}\right) \quad (1)$$

where  $\Delta G^0$  is the total Gibbs free energy variation for the electron transfer. The quasi-Marcus formula is an approximation of classic Marcus formula and parameters used in it are shown in

Figure S1:

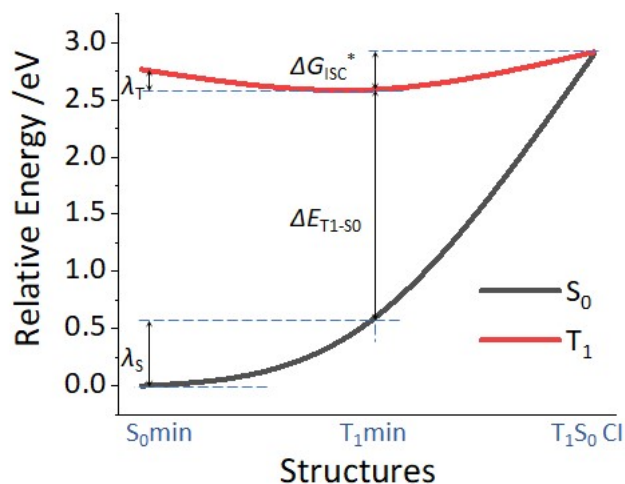

Figure S1. Definition of parameters used in the quasi-Marcus equation with the energy profiles between  $S_0$  minimum structure and  $T_1/S_0$  crossing point.

The reorganization energy ( $\lambda$ ) includes two distinct components.  $\lambda_s$  is the  $S_0$  energy difference between the  $T_1$  and the  $S_0$  minimum geometries, while  $\lambda_T$  is computed as the  $T_1$  energy difference between corresponding structures. The activation energy ( $\Delta G_{ISC}^*$ ) is the  $T_1$  Gibbs free energy difference between the initial  $T_1$  minimum and the final  $T_1/S_0$  crossing point during the triplet decay process.  $\Delta E_{T_1-S_0}$  is the energy difference between the  $T_1$  and ground states at the  $T_1$ -optimized structure.

1. R. A. Marcus, *The Journal of Chemical Physics*, 1984, **81**, 4494-4500.
2. Q. Ou and J. E. Subotnik, *The Journal of Physical Chemistry C*, 2013, **117**, 19839-19849.



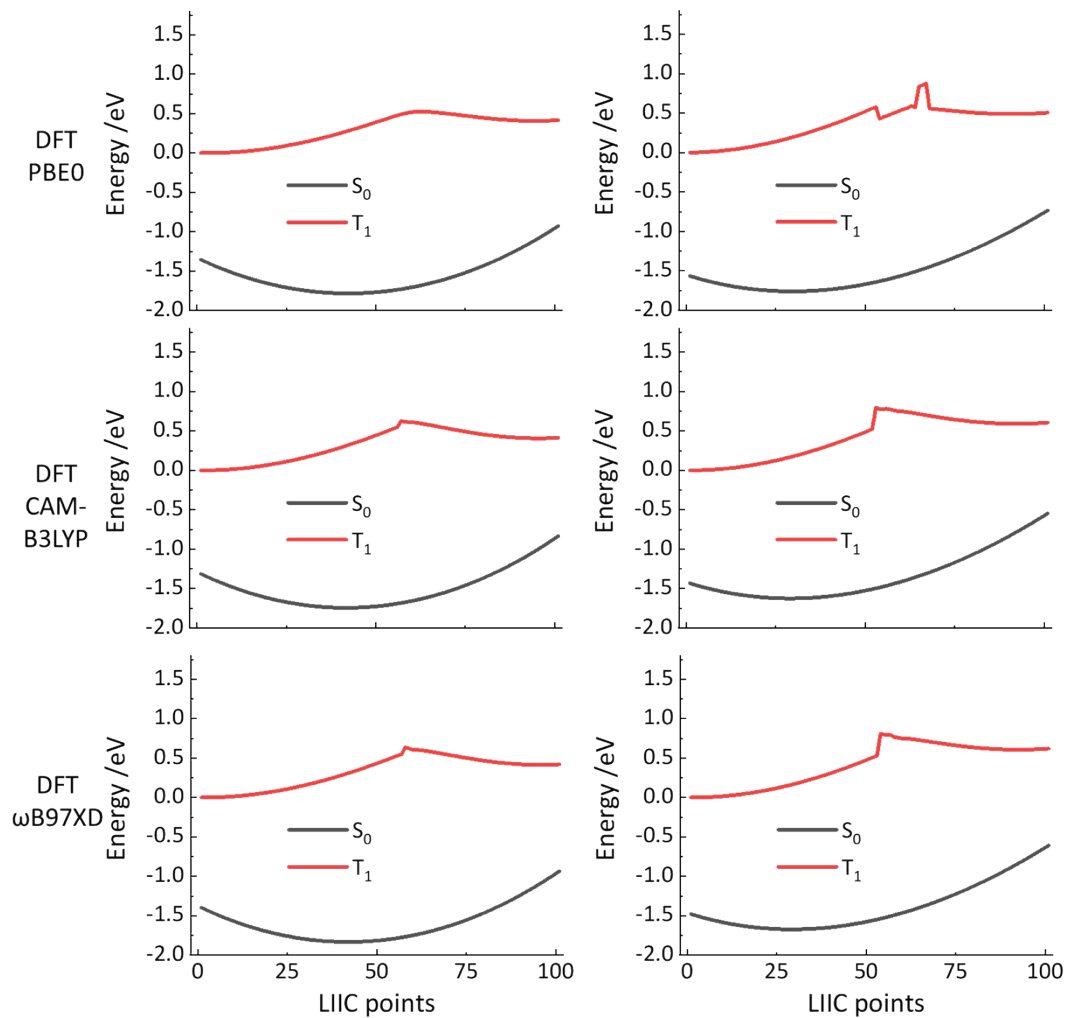

Figure S2. Potential energy profiles for the lowest excited states for (a) 6tGua and (b) 6SeGua from ADC(2), TDA-DFT, and DFT calculations with different functionals.

S4. The reorganization energy of 6tGua and 6SeGua in gas phase and with solvent model

Table S7. The reorganization energy of 6tGua and 6SeGua computed at DFT/B3LYP and TDA-DFT/B3LYP level.

| $\lambda$ /eV | DFT/B3LYP |                  |                            | TDA-DFT/B3LYP |                  |                            |
|---------------|-----------|------------------|----------------------------|---------------|------------------|----------------------------|
|               | Gas phase | Implicit solvent | mono-hydrated <sup>a</sup> | Gas phase     | Implicit solvent | mono-hydrated <sup>a</sup> |
| 6tGua         | 0.53      | 0.31             | 0.32                       | 0.47          | 0.19             | 0.21                       |
| 6SeGua        | 0.68      | 0.72             | 0.68                       | 0.56          | 0.65             | 0.61                       |

<sup>a</sup>mono-hydrated complex same as the one in Figure 6 and Table 2.

S5. The Spin-orbit couplings of 6tGua and 6SeGua

Table S8. The Spin-orbit couplings of 6tGua and 6SeGua computed at the two optimized T<sub>1</sub> structures as shown in Figure 2.

| T <sub>1</sub> optimized structure<br>SOCs /cm <sup>-1</sup> | Op-S/Se   | Ring distorted |
|--------------------------------------------------------------|-----------|----------------|
|                                                              | TDA-B3LYP | TDA-B3LYP      |
| 6tGua                                                        | 82.1      | 15.8           |
| 6SeGua                                                       | 611.0     | 93.0           |

Table S9. The Spin-orbit couplings of 6tGua and 6SeGua computed at the TD-B3LYP level, with the same structures as calculated in Table 1.

| T <sub>1</sub> /S <sub>0</sub> crossing<br>SOCs /cm <sup>-1</sup> | B3LYP     |       | TDA-B3LYP |       |
|-------------------------------------------------------------------|-----------|-------|-----------|-------|
|                                                                   | gas phase | PCM   | gas phase | PCM   |
| 6tGua                                                             | 89.8      | 74.7  | 90.3      | 76.0  |
| 6SeGua                                                            | 474.6     | 408.5 | 520.7     | 427.2 |
| SOC Ratio                                                         | 5.3       | 5.5   | 5.8       | 5.6   |

## S6. Mono-hydrated complex of 6tGua and 6SeGua

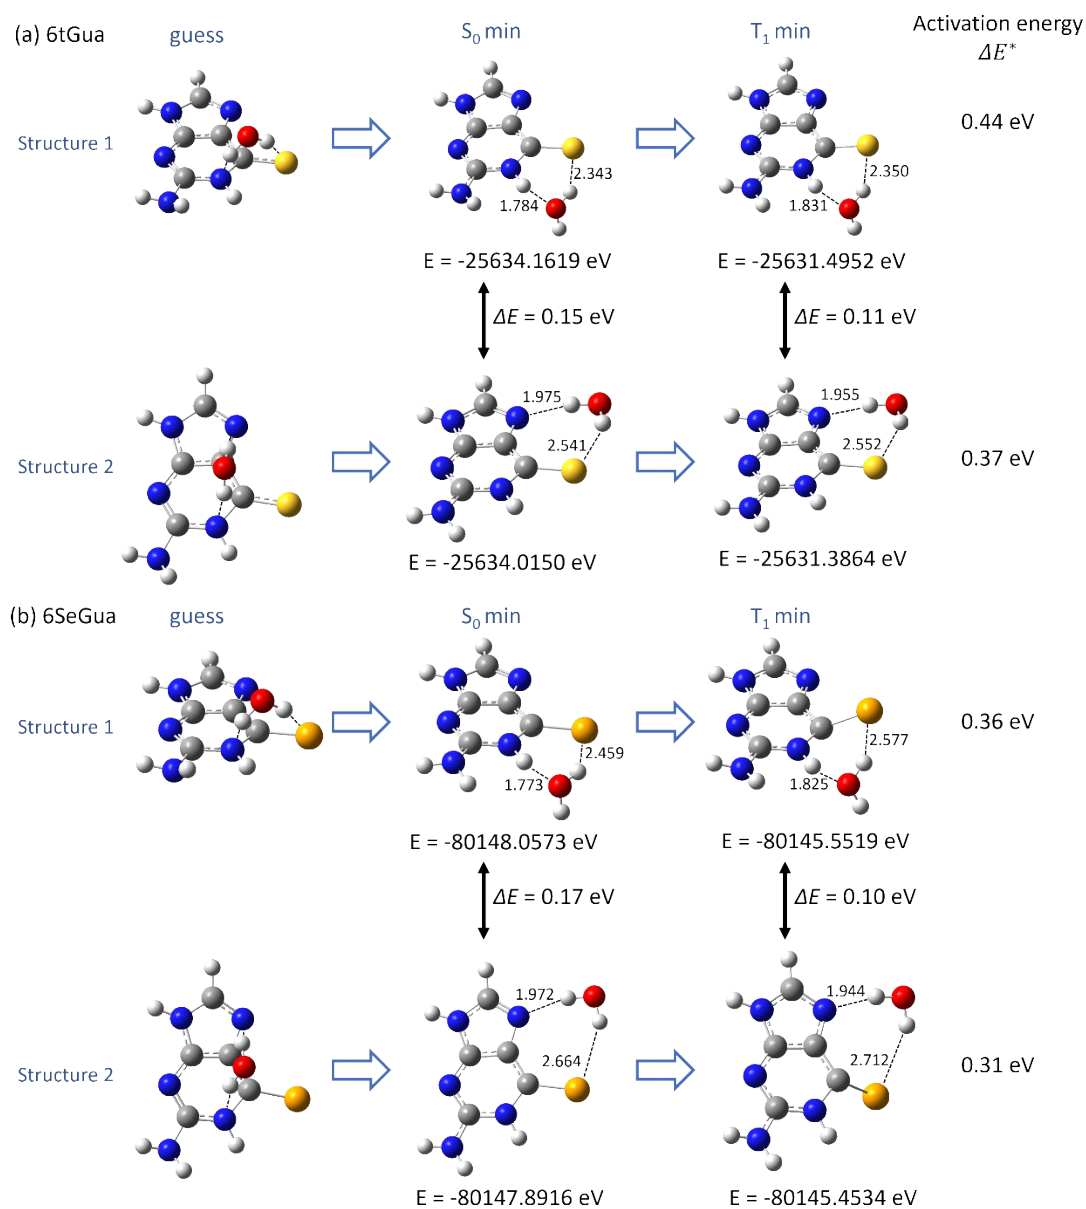

Figure S3. The different structures forming a mono-hydrated complex of (a) 6tGua and (b) 6SeGua at B3LYP/cc-pVDZ level. Bond length unit: Å.

S7. Di-hydrated complex and tri-hydrated complex of 6tGua and 6SeGua

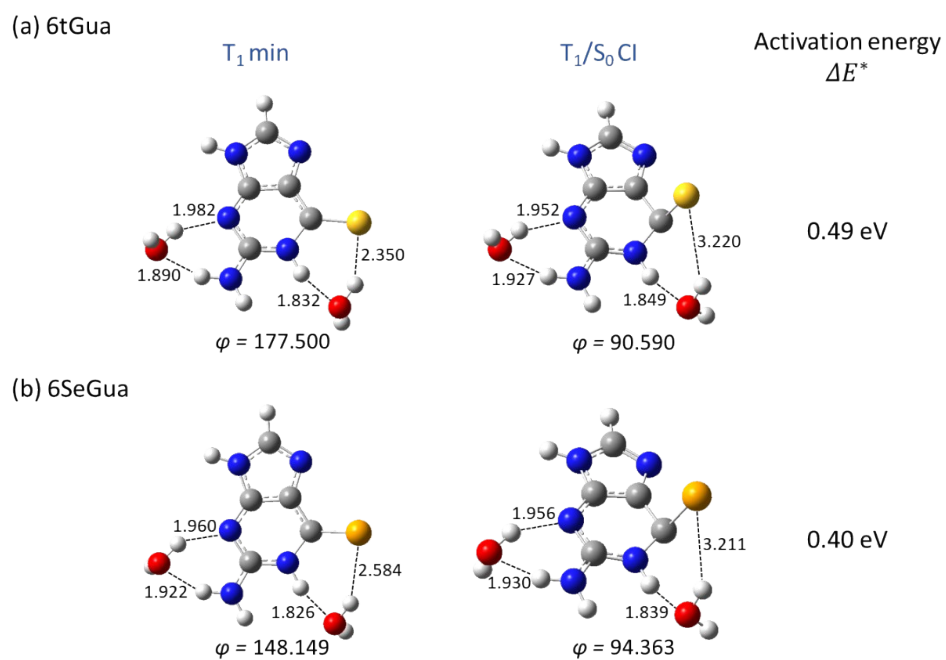

Figure S4. The optimized structure of di-hydrated complex of (a) 6tGua and (b) 6SeGua at TDA-B3LYP/cc-pVDZ level. Bond length unit: Å.

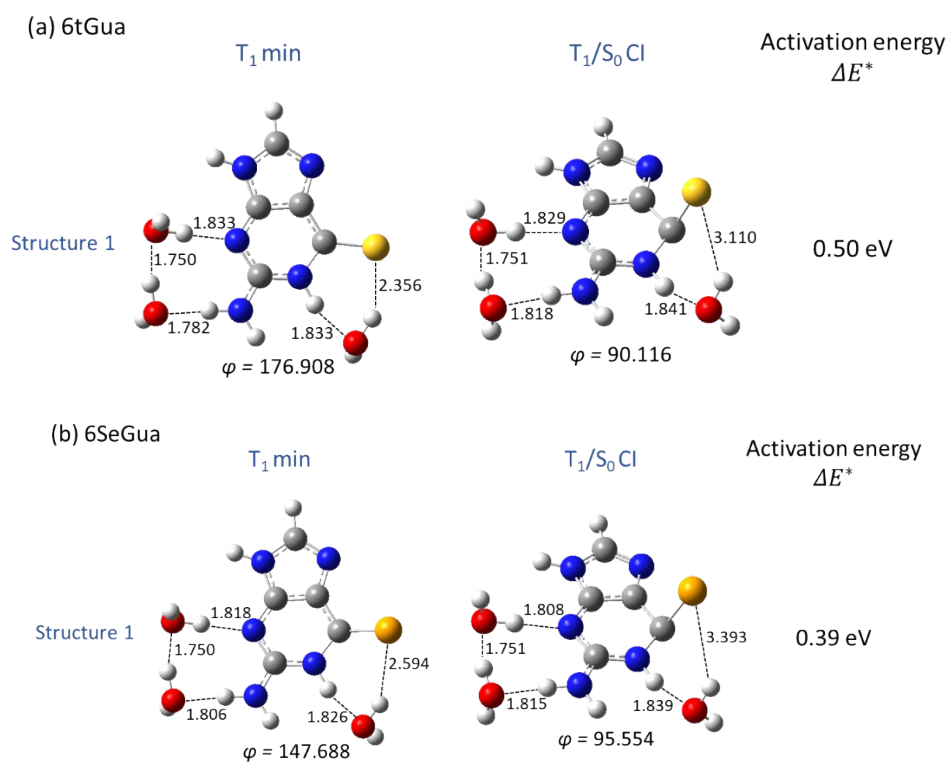

Figure S5. The optimized structure of tri-hydrated complex of (a) 6tGua and (b) 6SeGua at TDA-B3LYP/cc-pVDZ level. Bond length unit: Å.
